# Supplementary material for: Click-to-Release: Cleavable Radioimmunoimaging with [89Zr]Zr-DFO-Trans-Cyclooctene-Trastuzumab Increases Tumor-to-Blood Ratio
Source: PubMed Central journal article supplement (PMC10405837; doi:10.7150/thno.84865), 2023-07-09
Supplement: thnov13p4004s1.pdf [file thnov13p4004s1.pdf]

## Supplementary Information

**Click-to-Release: Cleavable Radioimmunoimaging with [<sup>89</sup>Zr]Zr-DFO-*Trans*-Cyclooctene-Trastuzumab Increases Tumor-to-Blood Ratio**

## ***Table of Contents***

|                                                                                      |    |
|--------------------------------------------------------------------------------------|----|
| <b><i>Reagents</i></b> .....                                                         | 3  |
| <b><i>Instrumentation</i></b> .....                                                  | 3  |
| <b><i>Synthesis of linker-chelator 2</i></b> .....                                   | 4  |
| <b><i>Synthesis of linker-chelator 4</i></b> .....                                   | 5  |
| <b><i>Synthesis of linker-chelator 6</i></b> .....                                   | 6  |
| <b><i>Synthesis of linker-chelator 7</i></b> .....                                   | 7  |
| <b><i>Synthesis of linker-chelator 8</i></b> .....                                   | 8  |
| <b><i>Preparation of conjugates Tmab-2, Tmab-4, Tmab-6, Tmab-7, Tmab-8</i></b> ..... | 9  |
| <b><i>Binding and internalization assay</i></b> .....                                | 9  |
| <b><i>Supplementary Figures</i></b> .....                                            | 10 |
| <b><i>Supplementary Tables</i></b> .....                                             | 18 |
| <b><i>MS analysis of Compounds 2, 4, 6-8</i></b> .....                               | 21 |
| <b><i>References</i></b> .....                                                       | 24 |

## ***Reagents***

All reagents and solvents were obtained from commercial sources (Sigma-Aldrich, Acros, Merck) and used without further purification, unless stated otherwise. 1-Amino-3,6,9,12-tetraoxapentadecan-15-oic-acid and N-(29-amino-3,6,9,12,15,18,21,24,27-nonaoxanonacosyl)-3-(2,5-dioxo-2,5-dihydro-1H-pyrrol-1-yl)propenamide as a TFA salt were purchased from Broadpharm. Tris(2-Carboxylethyl)phosphine (TCEP) was purchased from Thermo Fisher Scientific.

Trastuzumab solutions were purchased from Mylan (Ogivri) and were reconstituted following the manufacturer's instructions. Trastuzumab was purified using PD-10 cartridges (Cytiva) eluted with PBS. The concentration of the collected vials was determined by Nanodrop and the solutions were stored at -80 °C. [<sup>111</sup>In]Indium chloride and [<sup>89</sup>Zr]zirconium oxalate were purchased from Curium Pharma and Perkin Elmer, respectively. Water was distilled and deionized (18 MΩcm) by means of a milliQ-water filtration system (Millipore). Sterile phosphate buffered saline (PBS) was purchased from Fresenius Kabi. Amicon Ultra centrifugal devices (30kDa MW cut-off) were purchased from Millipore. Mouse serum was purchased from Innovative Research and was filtered through 0.2 μm filters before use. Zeba desalting spin columns (40kDa MW cut-off, 0.5mL) were purchased from Thermo Fisher Scientific. Chelex 100 (200-400 mesh) was purchased from Bio-Rad. For animal experiments, matrigel was purchased from Corning Life Sciences, the BT-474 cancer cell line was purchased from ATCC and 17β-estradiol releasing pellets (0.18 mg, 60 days release) were purchased from Innovative Research of America.

## ***Instrumentation***

NMR characterization of compounds was carried out on a Bruker AVANCE HD Nanobay console with a 9.4 T Ascend magnet (400 MHz) and a Bruker AVANCE III console with a 11.7 T UltraShield Plus magnet (500 MHz) equipped with a Bruker Prodigy cryoprobe. Chemical shifts are reported in ppm downfield from TMS at 25 °C. Abbreviations used from splitting patterns are s=singlet, t=triplet, q=quartet, m=multiplet and br=broad. Reverse phase (RP) liquid chromatography was performed on a Shimadzu HPLC system with MeCN/water mixtures (containing 0.1% TFA) as the eluent. LC-MS was recorded using Thermo Finigan LCQ Fleet system, applying a gradient of water and MeCN containing 0.1% TFA. Size exclusion Chromatography (SEC) was carried out on an AKTA-purifier system (Cytiva)

equipped with a UV detector, a Gabi radioactive detector and a fraction collector. The samples were loaded on a Superdex200 10/300 column (Cytiva) which was eluted with PBS with a flow rate of 0.6 mL/min. Radio-TLC was performed on ITLC-SG strips obtained by Agilent Technologies and eluted with 0.1M sodium citrate pH 6 and imaged on a phosphor imager (Typhoon FLA 7000; Cytiva). In these conditions, free  $^{89}\text{Zr}$  migrates with  $R_f=0.9$ , while  $^{89}\text{Zr}$ -labeled mAb remains at the origin. UV measurements were carried out on a Tecan Infinite 200 microplate reader. The antibody concentrations were measured using a Nanodrop 1000 spectrometer (Thermo Fisher Scientific) at 280 nm using a program for IgGs.

### *Synthesis of linker-chelator 2*

**2,5-Dioxopyrrolidin-1-yl(1R,6R,E)-1-methyl-6-(((3,14,25-trihydroxy-2,10,13,21,24-pentaoxo-3,9,14,20,25-pentaazatriacontan-30-yl)carbamoyl)oxy)cyclooct-4-ene-1-carboxylate (2).**

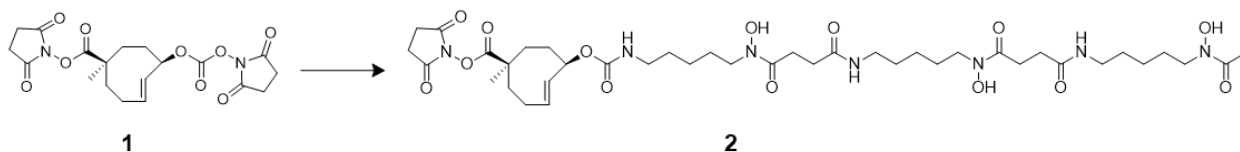

2,5-Dioxopyrrolidin-1-yl-6-(((2,5-dioxopyrrolidin-1-yl)oxy)carbonyl)oxy)-1-methylcyclooct-4-ene-1-carboxylate **1** was synthesized according to the literature procedure [1]. A mixture of **1** (15 mg, 0.035 mmol) and deferoxamine mesylate salt (29.9 mg, 0.046 mmol) in DMSO (1 mL) were stirred for 4 h at RT. The reaction was monitored by LC-MS. Upon completion of the reaction, the reaction mixture was diluted with water containing 0.1% TFA, followed by preparative RP-HPLC purification, using an elution gradient of 5% to 95% MeCN in water (both containing 0.1% TFA) to yield compound **2** (25.7 mg, 0.029 mmol, 84%) after lyophilization as a fluffy white powder.  $^1\text{H}$  NMR (400 MHz,  $\text{CDCl}_3$ )  $\delta$  5.87 (m, 1H), 5.63 (m, 1H), 5.17 (s, 1H), 3.64 (s, 3H), 3.62 (s, 1H), 3.21 (s, 4H), 2.82 (s, 4H), 2.67 (m, 4H), 2.29 (m, 3H), 2.23 (m, 3H), 2.08 (m, 2H), 1.95 (m, 2H), 1.84 (m, 8H), 1.65 (m, 4H), 1.54 (m, 5H), 1.42 (m, 5H), 1.26 (s, 3H), 1.19 (m, 3H) ppm. HPLC-MS/PDA:  $m/z$  = 868.44  $[\text{M}+\text{H}]^+$ , calcd. 867.46 for  $\text{C}_{40}\text{H}_{65}\text{N}_7\text{O}_{14}$ .

## Synthesis of linker-chelator 4

**2,5-Dioxopyrrolidin-1-yl(1R,6R,E)-1-methyl-6-((methyl(9,20,31-trihydroxy-2,10,13,21,24,32-hexaoxo-3,9,14,20,25,31-hexaazatritriacontyl)carbamoyl)oxy)cyclooct-4-ene-1-carboxylate (4).**

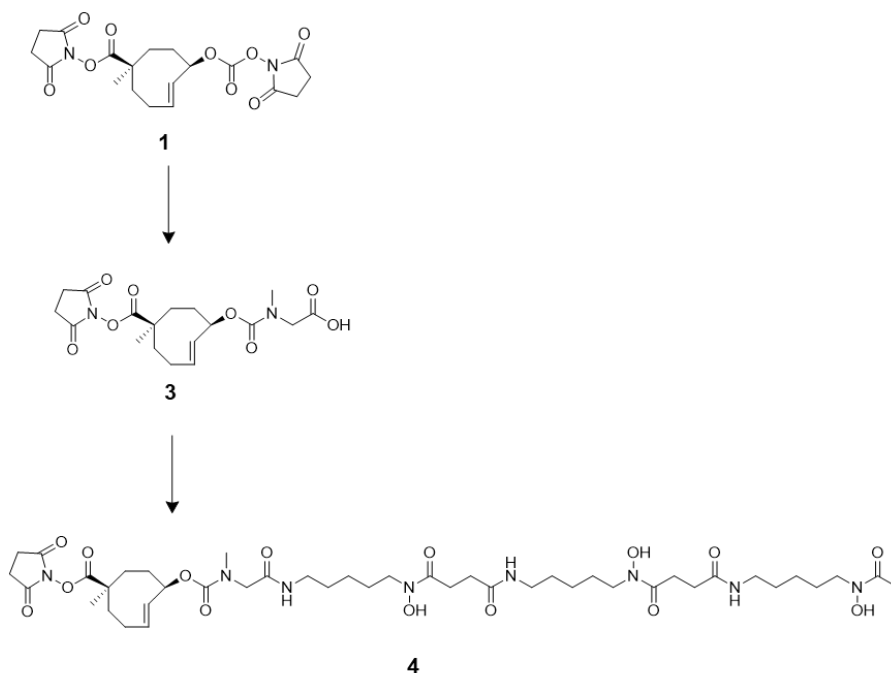

Compound **1** (15 mg, 0.035 mmol) and sarcosine (3.1 mg, 0.035 mmol) were mixed in water for 2 h. Water was removed and the formed product **3** was combined, without further purification, with PyBOP (18.2 mg, 0.035 mmol) and DIPEA (12.1  $\mu$ L, 0.07 mmol) in DMSO and the reaction mixture was stirred in RT for 10 min, before adding deferoxamine mesylate salt (24.9 mg, 0.038 mmol). The reaction mixture was stirred in RT for 3 h and was monitored by LC-MS. Upon completion of the reaction, the reaction mixture was diluted with water containing 0.1% TFA, followed by preparative RP-HPLC purification, using an elution gradient of 5% to 95% MeCN in water (both containing 0.1% TFA) to yield compound **4** (28 mg, 0.029 mmol, 83%) after lyophilization as a fluffy white powder.  $^1\text{H}$  NMR (400 MHz, DMSO- $d_6$ )  $\delta$  5.77 (m, 1H), 5.09 (m, 1H), 3.84 (m, 1H), 3.40 (m, 22H), 3.04-2.80 (m, 6H), 2.59-2.54 (m, 2H), 2.27-2.22 (m, 3H), 1.95 (s, 2H), .89-1.76 (m, 2H), 1.50-1.32 (m, 5H), 1.22 (m, 4H) ppm. HPLC-MS/PDA:  $m/z$  =939.20  $[\text{M}+\text{H}]^+$ , calcd. 938.50 for  $\text{C}_{43}\text{H}_{70}\text{N}_8\text{O}_{15}$ .

## Synthesis of linker-chelator **6**

**2,5-Dioxopyrrolidin-1-yl(1R,6R,E)-1-methyl-6-((methyl(25,36,47-trihydroxy-2,18,26,29,37,40,48-heptaoxo-6,9,12,15-tetraoxa-3,19,25,30,36,41,47-heptaazanonetetracontyl)carbamoyl)oxy)cyclooct-4-ene-1-carboxylate (**6**).**

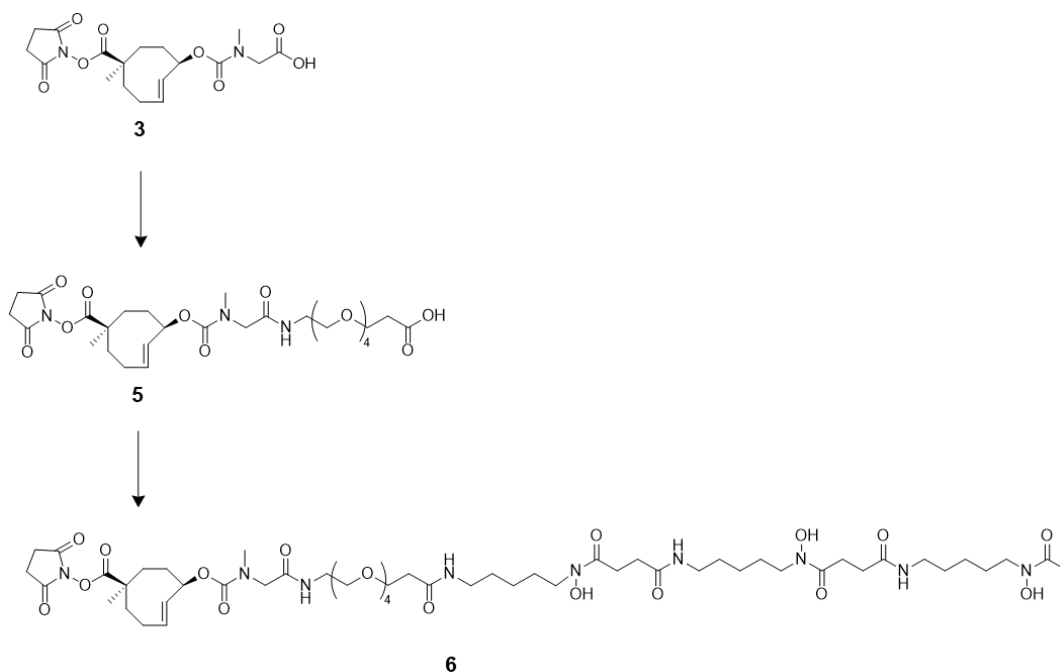

PyBOP (19.8 mg, 0.038 mmol) and DIPEA (13.2  $\mu$ L, 0.076 mmol) were added to a stirred solution of **3** (15 mg, 0.038 mmol) in DMF at RT for 10 min. Upon activation, a solution of amino-PEG4-acid (12.2 mg, 0.046 mmol) and DIPEA (17.79  $\mu$ L, 0.102 mmol) was added, and the solution was stirred for 4 h. Upon completion of the reaction, the reaction mixture was diluted with acidified water containing 0.1% TFA, followed by preparative RP-HPLC purification, using an elution gradient of 5% to 95% MeCN in water (both containing 0.1% TFA) to yield compound **5** (20 mg, 0.031 mmol, 82%) after lyophilization as a fluffy white powder.

PyBOP (16.1 mg, 0.031 mmol) and DIPEA (10.8  $\mu$ L, 0.062 mmol) were added to a solution of **5** (20 mg, 0.031 mmol) in DMSO and the reaction was stirred at RT for 10 min. A solution of deferoxamine mesylate salt (22.3 mg, 0.034 mmol) and DIPEA (10.8  $\mu$ L, 0.062 mmol) in DMSO was added and the reaction mixture was monitored by LC-MS. After 4 h, the reaction mixture was diluted with water containing 0.1% TFA, followed by preparative RP-HPLC purification, using an elution gradient of 5% to 95% MeCN in water (both containing 0.1%

TFA) to yield compound **6** (32 mg, 0.026 mmol, 86%) after lyophilization as a fluffy white powder. <sup>1</sup>H NMR (400 MHz, CDCl<sub>3</sub>) δ 5.88 (m, 1H), 5.66 (m, 1H), 5.24 (s, 1H), 3.89 (m, 6H), 3.77 (m, 2H), 3.64 (m, 15H), 3.49 (m, 2H), 3.06 (m, 3H), 2.82 (s, 3H), 2.60 (m, 2H), 2.38 (m, 1H), 2.30 (m, 2H), 2.15 (m, 3H), 1.92 (m, 2H), 1.27 (m, 3H) ppm. HPLC-MS/PDA: *m/z* = 1186.32 [M+H]<sup>+</sup>, calcd. 1185.64 for C<sub>54</sub>H<sub>91</sub>N<sub>9</sub>O<sub>20</sub>.

### *Synthesis of linker-chelator 7*

**(1R,6R,E)-6-((33-(2,5-Dioxo-2,5-dihydro-1H-pyrrol-1-yl)-31-oxo-3,6,9,12,15,18,21,24,27-nonaoxa-30-azatritriacontyl)carbamoyl)-6-methylcyclooct-2-en-1-yl(3,14,25-trihydroxy-2,10,13,21,24-pentaoxo-3,9,14,20,25-pentaazatriacontan-30-yl)carbamate (7).**

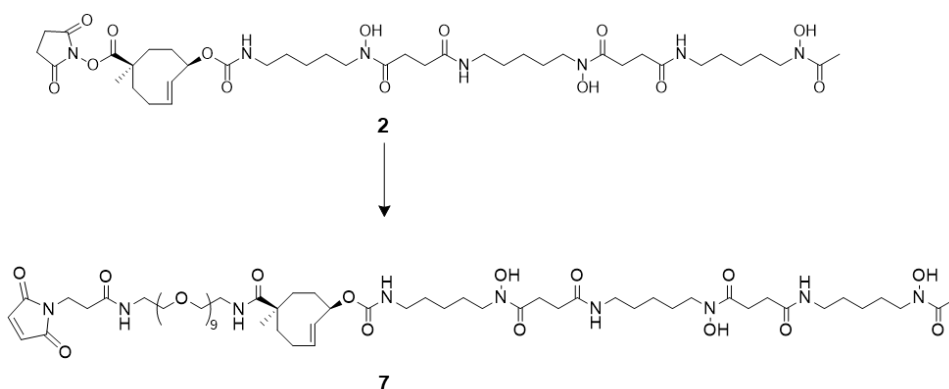

A mixture of maleimido-PEG9-amine TFA salt (14 mg, 0.023 mmol) in DMF (0.5 mL) and DIPEA (16.2 μL, 0.092 mmol) was added to a solution of **2** (20 mg, 0.023 mmol) in DMF (0.5 mL). The reaction mixture was stirred at RT for 2 h and monitored by LC-MS. Upon the formation of the desired product, the reaction mixture was diluted with water containing 0.1% TFA, followed by preparative RP-HPLC purification, using an isocratic elution of 20% MeCN in water (both containing 0.1% TFA) to yield compound **7** (4.5 mg, 0.003 mmol, 14%) after lyophilization as a colorless oil. <sup>1</sup>H NMR (500 MHz, CDCl<sub>3</sub>) δ 6.70 (s, 2H), 5.87 (m, 1H), 5.19 (s, 1H), 3.83 (m, 1H), 3.65-3.61 (m, 17H), 3.42 (m, 2H), 3.21 (m, 2H), 2.80-2.62 (m, 3H), 2.53 (m, 1H), 2.29-2.23 (m, 2H), 2.11-1.91 (m, 2H), 1.17 (m, 13H), 1.37 (m, 4H), 1.12 (m,

2H), 0.95-0.83 (m, 1H) ppm. HPLC-MS/PDA:  $m/z = 1360.40$   $[M+H]^+$ , calcd. 1359.76 for  $C_{63}H_{109}N_9O_{23}$ .

### Synthesis of linker-chelator **8**

**(1R,6R,E)-6-((33-(2,5-Dioxo-2,5-dihydro-1H-pyrrol-1-yl)-31-oxo-3,6,9,12,15,18,21,24,27-nonaoxa-30-azatritriacontyl)carbamoyl)-6-methylcyclooct-2-en-1-yl methyl(25,36,47-trihydroxy-2,18,26,29,37,40,48-heptaoxo-6,9,12,15-tetraoxa-3,19,25,30,36,41,47-heptaazanonatetracontyl)carbamate (**8**).**

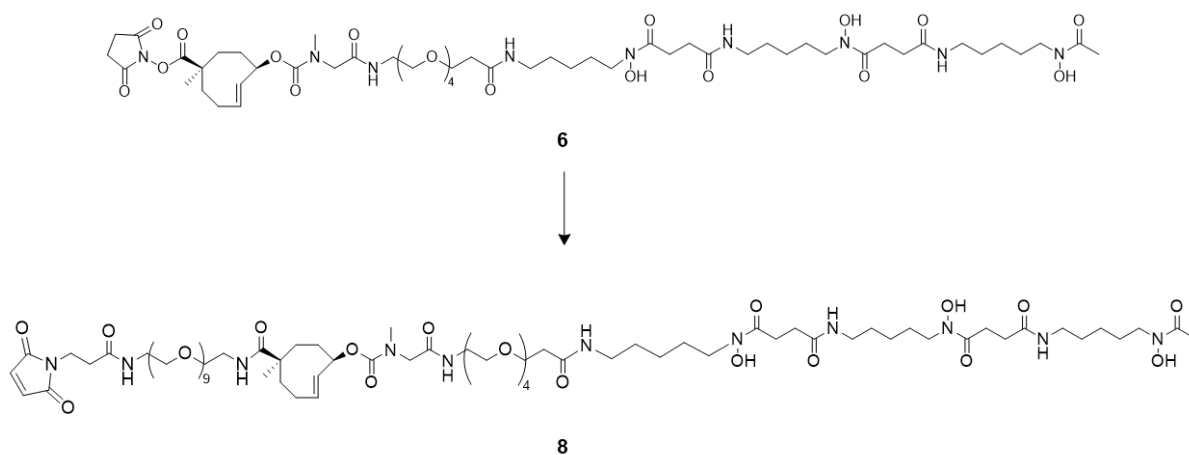

A mixture of maleimido-PEG9-amine TFA salt (4 mg, 0.023 mmol) in DMF (0.5 mL) and DIPEA (6.2  $\mu$ L, 0.092 mmol) was added to a solution of **6** (20 mg, 0.023 mmol) in DMF (0.5 mL). The reaction mixture was stirred at RT for 2 h and monitored by LC-MS. Upon the formation of the desired product, the reaction mixture was diluted with water containing 0.1% TFA, followed by preparative RP-HPLC purification, using an isocratic elution of 20% MeCN in water (both containing 0.1% TFA) to yield compound **8** (4.2 mg, 0.002 mmol, 11%) after lyophilization as a colorless oil. Isolated compound **8** contains an impurity resulting from addition of maleimido-PEG9-amine to the maleimide moiety in **8** (ca. 10% by analytical HPLC).  $^1H$  NMR (500 MHz,  $CDCl_3$ )  $\delta$  6.70 (s, 2H), 5.87 (m, 1H), 5.62 (m, 1H), 5.19 (s, 1H), 3.99-3.94 (m, 1H), 3.84 (m, 1H), 3.72 (m, 1H), 3.65-3.61 (m, 17 H), 3.53 (m, 2H), 3.49-3.46 (m, 1H), 3.41 (m, 1H), 3.21 (m, 3H), 3.08-3.01 (m, 2H), 2.83 (m, 2H), 2.62-2.57 (m, 2H), 2.53-2.49 (m, 2H), 2.04-2.01 (m, 1H), 1.31-1.19 (m, 21H), 1.12 (m, 4H), 0.89-0.81 (m, 7H) ppm. HPLC-MS/PDA:  $m/z = 1677.56$   $[M-H]^+$ , calcd. 1677.94 for  $C_{77}H_{135}N_{11}O_{29}$ .



### ***Preparation of conjugates Tmab-2, Tmab-4, Tmab-6, Tmab-7, Tmab-8***

Trastuzumab was conjugated to compounds **2**, **4**, **6** via NHS chemistry. Typically, trastuzumab (1 mg) was reacted for 2 h with the linker-chelator (35 eq) in PBS (final concentration 4 mg/mL, pH adjusted to ca 8.8 with 1M sodium carbonate). The crude reaction mixture was purified using SEC chromatography and chelex-treated PBS as an eluent and then the purified mAb conjugate was stored in aliquots at -80 °C for further use. Typically, this procedure afforded ca 1.6 linker-chelator per antibody, as determined by a tetrazine titration with <sup>111</sup>In-labeled tetrazine, analyzed by SDS-PAGE [1].

Trastuzumab was conjugated to compounds **7** and **8** via maleimide chemistry using a modification of an already published procedure [2]. Trastuzumab (1 mg) was partially reduced with 2.3 eq TCEP in PBS at 37 °C for 30 min. Then, the solution was 1:1 diluted with PBS containing 5mM EDTA (pH adjusted to 6.8) and was cooled on ice. The reduced antibody was reacted with the linker-chelator **7** or **8** (10 eq, 10 mg/mL in DMSO) for 30 min on ice and then overnight at 4 °C in the dark. The crude reaction mixture was purified by SEC using chelex-treated PBS as eluent and then stored in aliquots in -80 °C for further use. Typically, this procedure afforded 2.5 linker-chelators per antibody, as measured by tetrazine titration [1].

### ***Binding and internalization assay***

The HER2 positive BT-474 cells were cultured in RPMI medium supplemented with 2 mM glutamine and 10% fetal calf serum. Approximately 48 h prior to the experiment, the cells were plated in 6-well plates at 0.6 million cells/well in 3 mL medium. At the time of the experiment, the cells were washed one time with pre-warmed PBS, followed by incubation for 6 or 24 h with 0.26 µg of <sup>89</sup>Zr-conjugate in 3 mL binding medium (RPMI containing 0.5% BSA). Three wells were used for each condition. Blocking experiments were performed by adding a large excess (1000 eq) of trastuzumab to the medium. After incubation, the medium was removed and the cells were washed twice with ice-cold PBS followed by lysis in 0.1 M NaOH. To calculate the membrane bound activity, the cells were incubated with an acid buffer (0.1 M acetic acid, 154 mM NaCl, pH 2.6) on ice for 10 min. The lysates and acid wash solutions were measured by γ-counting together with standards to calculate the 100% added activity.

## Supplementary Figures

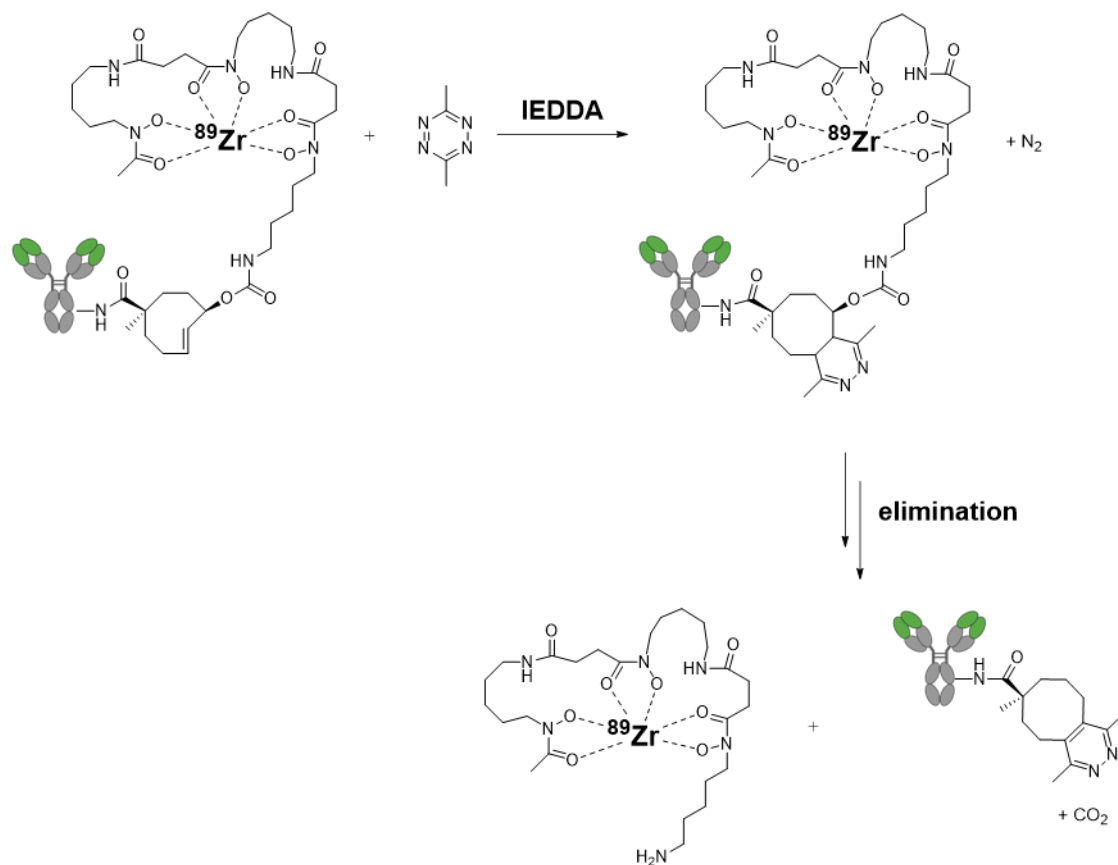

**Figure S1.** Example of click-to-release reaction between conjugate [ $^{89}\text{Zr}$ ]Zr-Tmab-2 and trigger 9.

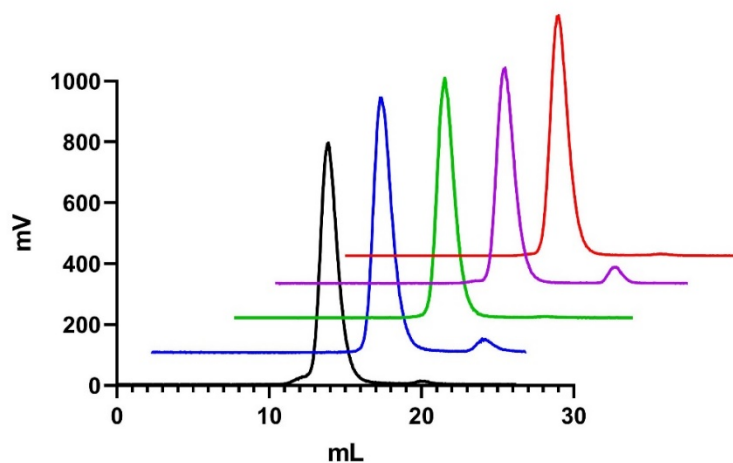

**Figure S2. SEC analysis of <sup>89</sup>Zr-labeled conjugates.** After Zeba purification, the <sup>89</sup>Zr-labeled mAbs were analyzed by SEC on a Superdex200 10/300 column eluted with PBS to assess the radiochemical purity. Black: [<sup>89</sup>Zr]Zr-Tmab-2, 99.0% radiochemical purity (RCP); blue: [<sup>89</sup>Zr]Zr-Tmab-4, 95.7% RCP; green: [<sup>89</sup>Zr]Zr-Tmab-6, 99.8% RCP; purple: [<sup>89</sup>Zr]Zr-Tmab-7, 95.0% RCP; red: [<sup>89</sup>Zr]Zr-Tmab-8: 99.4% RCP.

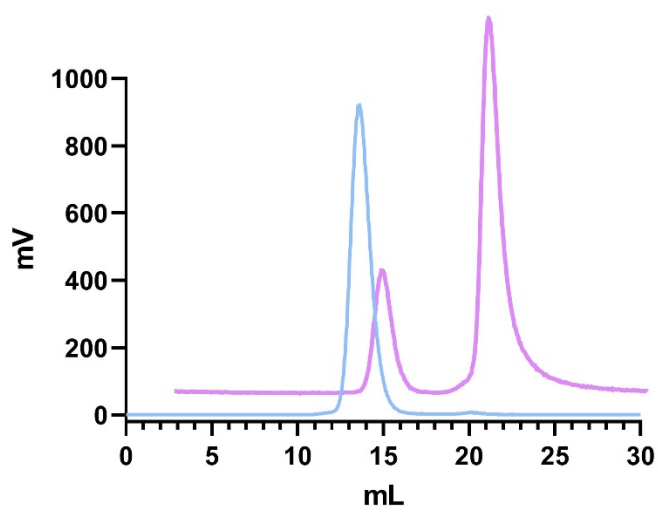

**Figure S3. Release experiments in PBS.** SEC profile of (blue)  $[^{89}\text{Zr}]\text{Zr-Tmab-8}$  incubated overnight in PBS at 37 °C and (pink) of  $[^{89}\text{Zr}]\text{Zr-Tmab-8}$  when reacted with 300 eq of trigger **10** in PBS for 24 h at 37 °C.

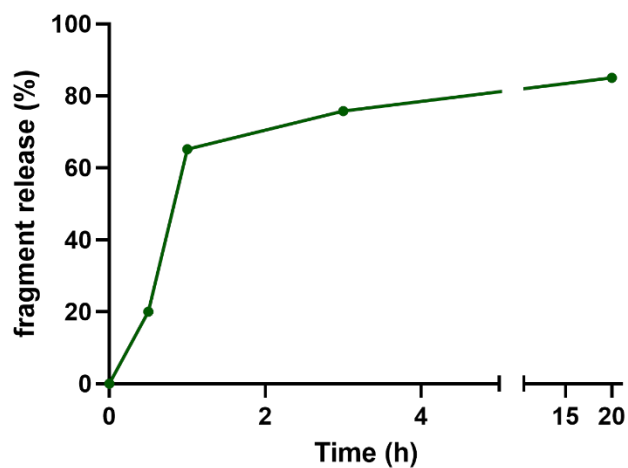

**Figure S4. Release experiments in plasma between [<sup>89</sup>Zr]Zr-Tmab-8 and trigger 10.** The conjugate was radiolabeled with Zr-89 and was incubated with **10** (300 eq) in 50% mouse plasma in PBS at 37 °C for up to 20 h. The kinetics of the release was monitored by SEC at different time points.

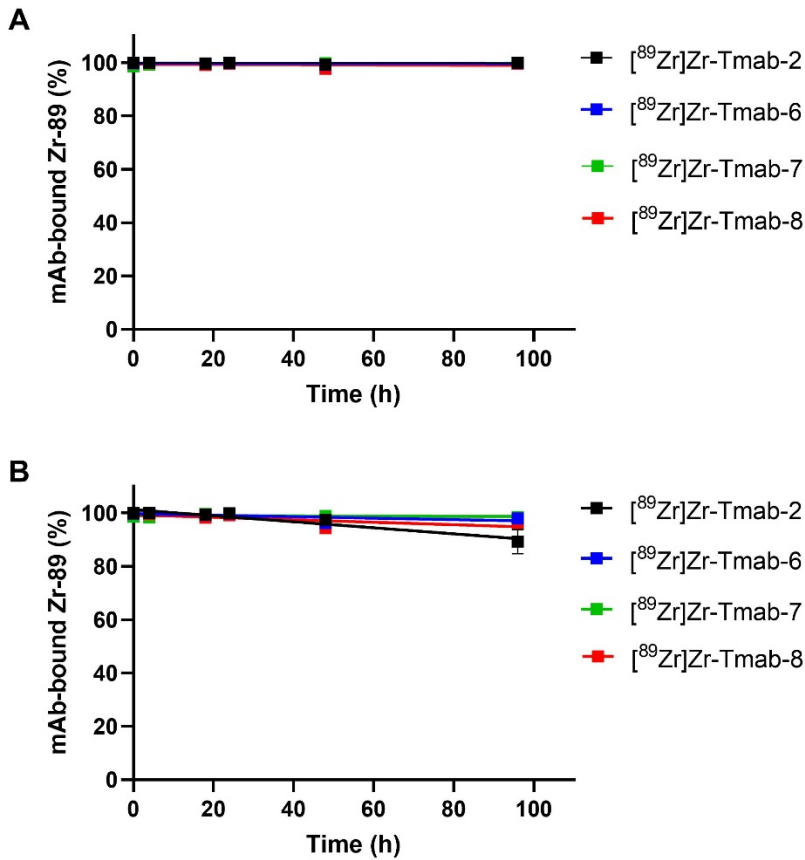

**Figure S5: Stability of <sup>89</sup>Zr-labeled mAb constructs.** Zr-89 release in (A) 50% human serum and (B) 50% mouse serum at 37 °C, as shown by radio-ITLC analysis. Data represent the mean with one SD (n=3).

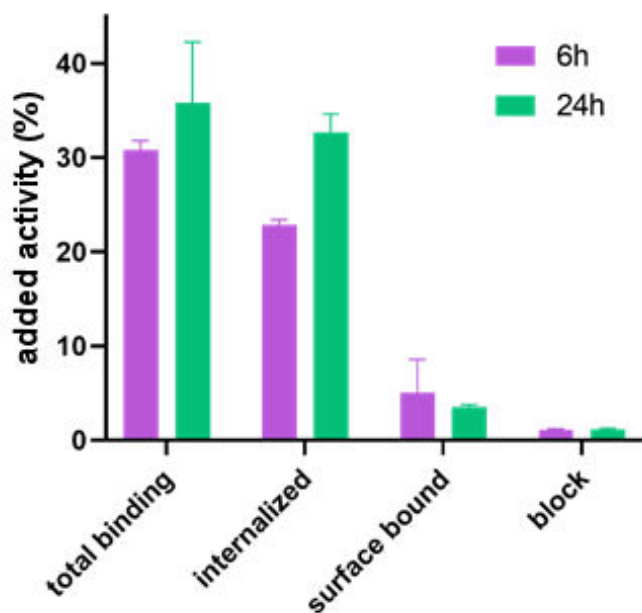

**Figure S6. Binding and internalization cell assay.** Total cell associated activity expressed in % of added radioactivity. Cells were incubated with [<sup>89</sup>Zr]Zr-Tmab-8 for 6 h and 24 h. The bound and internalized radioactivity (total binding), the internalized radioactivity and the cell surface bound radioactivity were measured by  $\gamma$ -counting. Blocking was performed with 1000 eq of non-radiolabeled trastuzumab. Data are the mean with SD (n = 3).

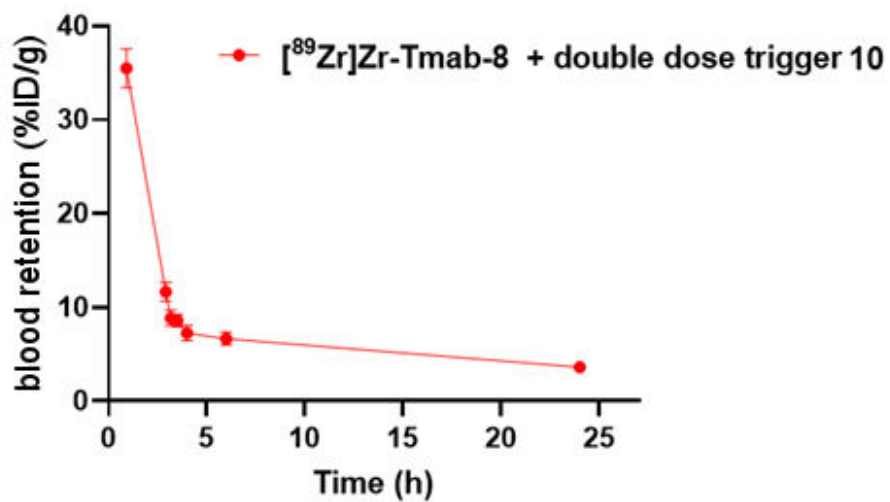

**Figure S7. Triggered release in tumor-free nude mice.** Blood kinetic studies in mice that received  $[^{89}\text{Zr}]\text{Zr-Tmab-8}$ . One hour post mAb injection the mice received one dose of trigger **10** ( $33.4 \mu\text{mol/kg}$ ) and 2 h later the mice received an extra dose of trigger **10** ( $33.4 \mu\text{mol/kg}$ ). The data points are the mean %ID/g  $\pm$  SD ( $n = 4$ ).



## scan 1

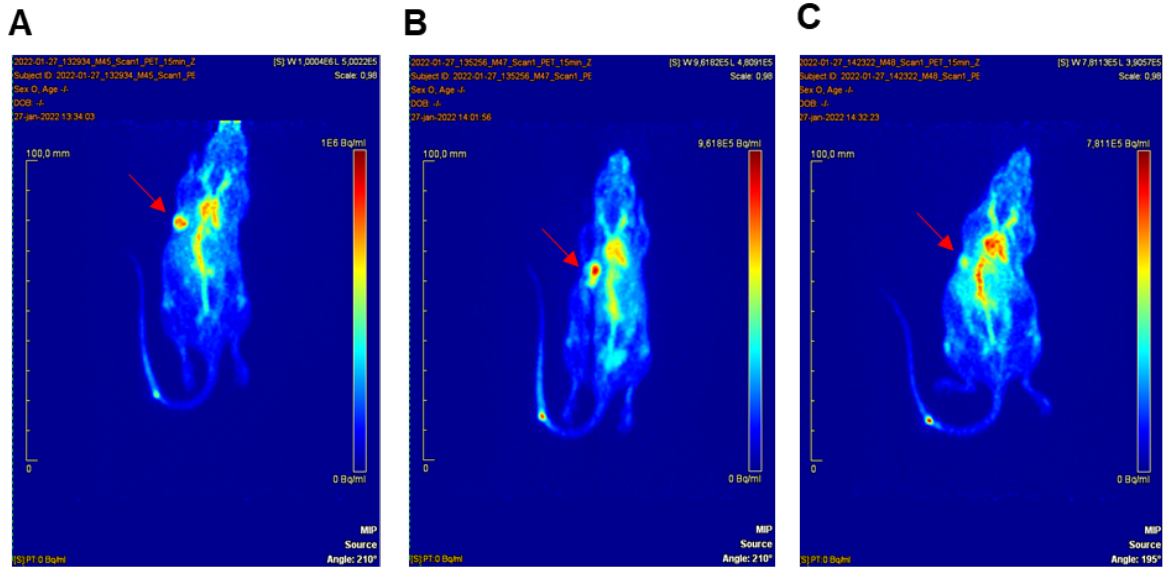

## scan 2

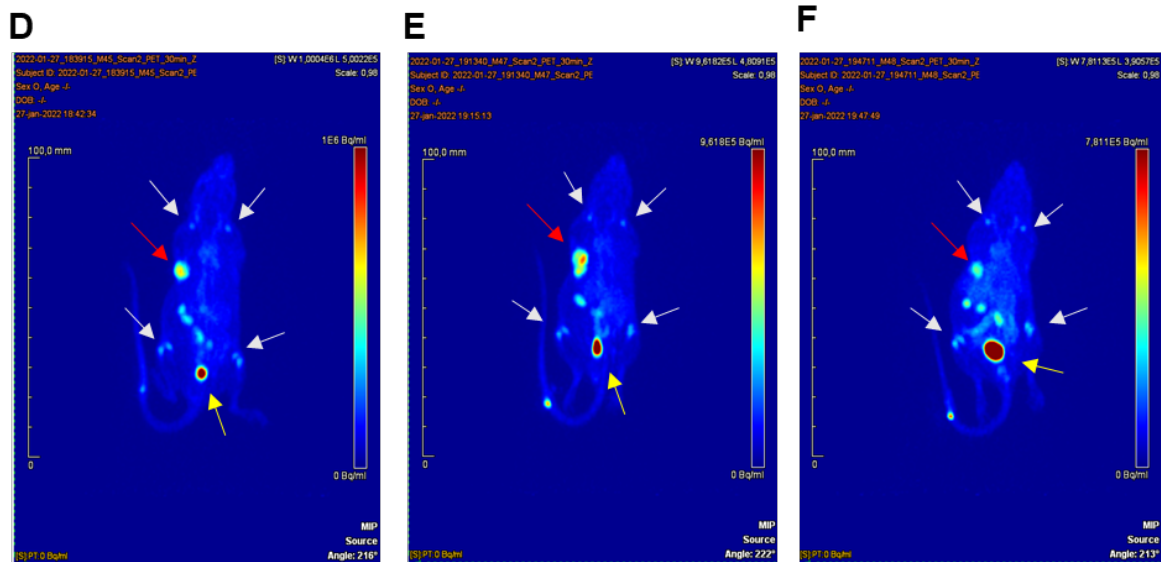

**Figure S8. PET imaging studies.** Mice were injected with [ $^{89}\text{Zr}$ ]Zr-Tmab-8 (ca. 0.5 mg/kg; 5 MBq in 100  $\mu\text{L}$ ) and 5 h later they were imaged under anesthesia obtaining scan 1 (A, B, C). One hour later, after recovery from anesthesia, the same mice received one dose of trigger 10 (33.4  $\mu\text{mol/kg}$ ) and 4 h post-trigger injection they were imaged again obtaining scan 2 (D, E, F). Images are presented as maximum intensity projections (MIPs), maximum intensity  $9.62 \cdot 10^{-5}$  Bq/mL. In all images tumor site is indicated by a red arrow, bladder is indicated by a yellow arrow and the joints are indicated by white arrows.

## Supplementary Tables

**Table S1.** Biodistribution studies in tumor-free mice. One group of mice received [<sup>89</sup>Zr]Zr-Tmab-8 (ca. 0.5 mg/kg, ca 0.5 MB in 100 μL) and 4 days later were euthanized (no trigger). One group of mice received [<sup>89</sup>Zr]Zr-Tmab-8 and 1 h post-mAb injection received a single dose of trigger 10 (33.4 μmol/kg). One group of mice received [<sup>89</sup>Zr]Zr-Tmab-8 followed by one dose of trigger 10 at 1 h and one a 2 h post-mAb. These mice were euthanized 24 h after the last dose of trigger. Data are the mean % ID/g with SD (n = 4).

| <b>Organ<br/>(%ID/g)</b> | <b>no trigger</b> | <b>single dose<br/>trigger 10</b> | <b>double dose<br/>trigger 10</b> |
|--------------------------|-------------------|-----------------------------------|-----------------------------------|
| blood                    | 11.55 ± 1.82      | 3.93 ± 0.29                       | 3.61 ± 0.20                       |
| heart                    | 3.03 ± 0.45       | 1.01 ± 0.09                       | 0.91 ± 0.07                       |
| lung                     | 8.56 ± 1.29       | 2.09 ± 0.45                       | 1.93 ± 0.46                       |
| liver                    | 3.65 ± 0.72       | 1.28 ± 0.12                       | 1.32 ± 0.17                       |
| spleen                   | 2.16 ± 0.23       | 0.76 ± 0.16                       | 0.85 ± 0.07                       |
| pancreas                 | 0.88 ± 0.16       | 0.41 ± 0.07                       | 0.29 ± 0.04                       |
| kidney left              | 5.73 ± 0.89       | 2.51 ± 0.32                       | 2.67 ± 0.13                       |
| kidney right             | 5.87 ± 0.80       | 2.51 ± 0.14                       | 2.89 ± 0.12                       |
| muscle                   | 0.76 ± 0.13       | 0.28 ± 0.01                       | 0.33 ± 0.17                       |
| bone                     | 2.63 ± 0.24       | 0.57 ± 0.01                       | 0.60 ± 0.06                       |
| brain                    | 0.28 ± 0.04       | 0.12 ± 0.02                       | 0.09 ± 0.01                       |
| stomach*                 | 0.23 ± 0.04       | 0.12 ± 0.05                       | 0.09 ± 0.01                       |
| small intestine*         | 1.43 ± 0.11       | 0.50 ± 0.02                       | 0.38 ± 0.10                       |
| large intestine*         | 0.61 ± 0.15       | 0.26 ± 0.07                       | 0.26 ± 0.13                       |

\*These values are expressed in %ID/organ.

**Table S2.** Biodistribution studies in tumor-bearing mice. Two groups of mice received [<sup>89</sup>Zr]Zr-Tmab-8 (ca. 0.5 mg/kg, ca. 0.5 MB in 100 μL) followed by one dose of trigger **10** (33.4 μmol/kg) 6 h or 24 h post-mAb administration. The mice were euthanized 4 h after the trigger dose. Control mice that did not receive the trigger were euthanized 6 h and 24 h post-mAb injection. Data are the mean % ID/g with SD (n=5).

| <b>Organ<br/>(%ID/g)</b> | <b>6 h<br/>no trigger</b> | <b>6 h<br/>trigger 10</b> | <b>24 h<br/>no trigger</b> | <b>24 h<br/>trigger 10</b> |
|--------------------------|---------------------------|---------------------------|----------------------------|----------------------------|
| blood                    | 34.78 ± 2.16              | 9.73 ± 1.56               | 22.21 ± 1.84               | 8.40 ± 0.50                |
| tumor                    | 33.75 ± 14.82             | 22.49 ± 7.24              | 54.68 ± 13.43              | 55.63 ± 10.60              |
| heart                    | 8.80 ± 0.79               | 2.48 ± 0.32               | 6.06 ± 0.14                | 2.47 ± 0.25                |
| lung                     | 14.79 ± 6.26              | 5.61 ± 1.73               | 11.91 ± 5.16               | 5.28 ± 0.68                |
| liver                    | 8.69 ± 1.22               | 3.77 ± 0.43               | 5.90 ± 0.75                | 4.19 ± 0.76                |
| spleen                   | 6.75 ± 1.23               | 2.10 ± 0.27               | 4.96 ± 0.70                | 2.76 ± 0.45                |
| pancreas                 | 2.75 ± 0.26               | 1.07 ± 0.17               | 2.96 ± 0.35                | 1.54 ± 0.35                |
| kidney left              | 10.84 ± 1.05              | 6.02 ± 1.25               | 10.39 ± 1.24               | 8.71 ± 0.40                |
| kidney right             | 11.71 ± 0.75              | 6.08 ± 1.33               | 9.91 ± 1.19                | 8.63 ± 0.47                |
| muscle                   | 1.40 ± 0.16               | 0.65 ± 0.12               | 1.79 ± 0.30                | 0.86 ± 0.18                |
| bone                     | 3.44 ± 0.55               | 1.68 ± 0.33               | 4.31 ± 0.62                | 3.38 ± 0.46                |
| brain                    | 0.75 ± 0.16               | 0.26 ± 0.06               | 0.52 ± 0.05                | 0.25 ± 0.02                |
| fat                      | 6.53 ± 1.24               | 2.67 ± 0.45               | 7.13 ± 1.38                | 3.62 ± 0.55                |
| skin                     | 8.03 ± 1.33               | 2.99 ± 0.39               | 7.21 ± 1.24                | 3.67 ± 0.39                |
| stomach*                 | 0.86 ± 0.18               | 2.01 ± 3.53               | 0.83 ± 0.15                | 0.98 ± 1.20                |
| small intestine*         | 5.00 ± 0.41               | 4.88 ± 0.69               | 3.51 ± 0.45                | 4.31 ± 1.12                |
| large intestine*         | 2.52 ± 0.19               | 7.58 ± 1.90               | 1.77 ± 0.59                | 7.06 ± 5.82                |

\*These values are expressed in %ID/organ.

**Table S3.** Biodistribution studies (tumor-to-organ) in tumor-bearing mice. Mice received [<sup>89</sup>Zr]Zr-Tmab-8 (ca 0.5 mg/kg, ca 0.5 MBq in 100 μL) followed by one dose of trigger 10 (33.4 μmol/kg) 6 h or 24 h post-mAb administration. The mice were euthanized 4 h after the trigger dose in both cases. Control mice that did not receive the trigger were euthanized 6 h and 24 h post-mAb injection. Data are the mean with SD (n =5).

| <b>Tumor/organ</b> | <b>6 h<br/>no trigger</b> | <b>6 h<br/>trigger 10</b> | <b>24 h<br/>no trigger</b> | <b>24 h<br/>trigger 10</b> |
|--------------------|---------------------------|---------------------------|----------------------------|----------------------------|
| blood              | 1.0 ± 0.4                 | 2.3 ± 0.6                 | 2.5 ± 0.7                  | 6.6 ± 0.9                  |
| heart              | 3.8 ± 1.3                 | 8.9 ± 2.3                 | 9.0 ± 2.4                  | 22.44 ± 3.0                |
| lung               | 2.2 ± 0.7                 | 4.0 ± 1.0                 | 4.8 ± 1.8                  | 10.8 ± 2.9                 |
| liver              | 3.8 ± 1.1                 | 6.0 ± 1.9                 | 9.3 ± 2.2                  | 13.6 ± 3.4                 |
| spleen             | 4.9 ± 1.4                 | 10.8 ± 3.6                | 11.4 ± 4.0                 | 20.5 ± 4.7                 |
| pancreas           | 12.3 ± 5.4                | 21.2 ± 6.7                | 19.0 ± 6.4                 | 36.6 ± 6.1                 |
| kidney left        | 3.1 ± 1.3                 | 3.8 ± 1.2                 | 5.4 ± 1.7                  | 6.4 ± 1.2                  |
| kidney right       | 2.9 ± 1.3                 | 3.6 ± 0.7                 | 5.5 ± 1.2                  | 6.4 ± 1.1                  |
| muscle             | 24.1 ± 10.0               | 34.7 ± 11.9               | 31.8 ± 11.4                | 67.9 ± 21.8                |
| bone               | 9.9 ± 4.0                 | 13.6 ± 4.7                | 12.8 ± 3.6                 | 16.6 ± 3.5                 |
| brain              | 45.8 ± 19.3               | 85.9 ± 24.7               | 106.3 ± 29.2               | 218.8 ± 33.5               |
| fat                | 5.1 ± 1.6                 | 8.6 ± 3.2                 | 7.7 ± 1.3                  | 15.8 ± 4.5                 |
| skin               | 4.3 ± 2.2                 | 7.4 ± 2.0                 | 7.9 ± 2.9                  | 15.3 ± 3.2                 |

## MS analysis of Compounds 2, 4, 6-8

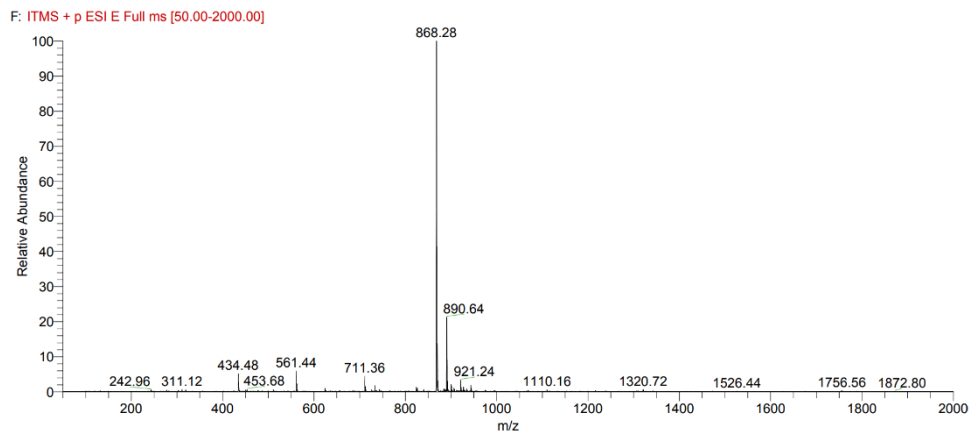

MS analysis of compound 2. Calcd.  $[M+H]^+$  868.46,  $[M+2H]^{2+}$  434.73,  $[M+Na]^+$  890.45

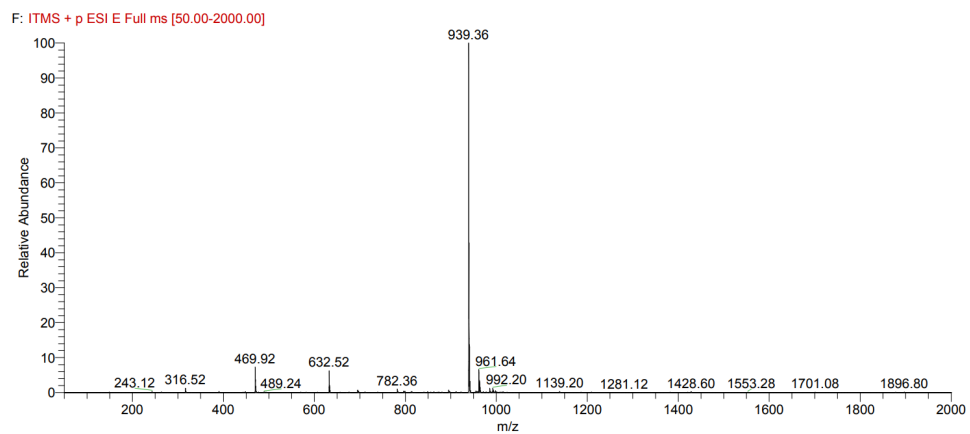

MS analysis of compound 4. Calcd.  $[M+H]^+$  939.50,  $[M+2H]^{2+}$  470.25,  $[M+Na]^+$  961.49

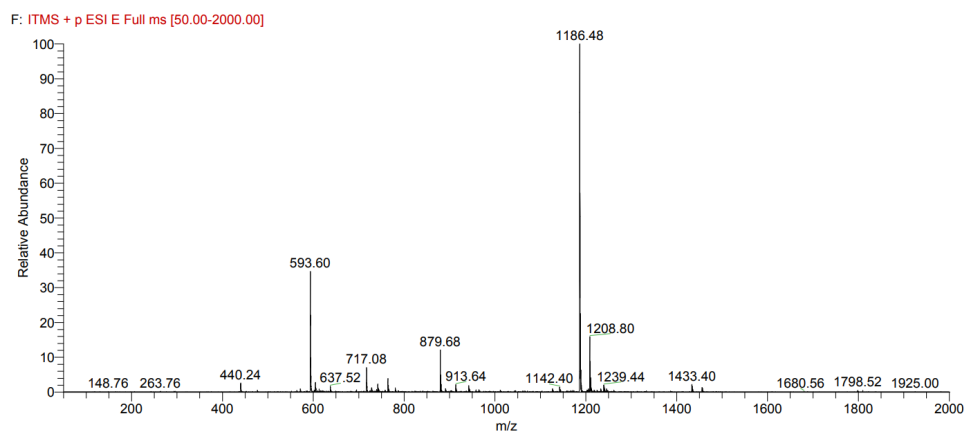

MS analysis of compound 6. Calcd.  $[M+H]^+$  1186.64,  $[M+2H]^{2+}$  593.82,  $[M+Na]^+$  1208.63

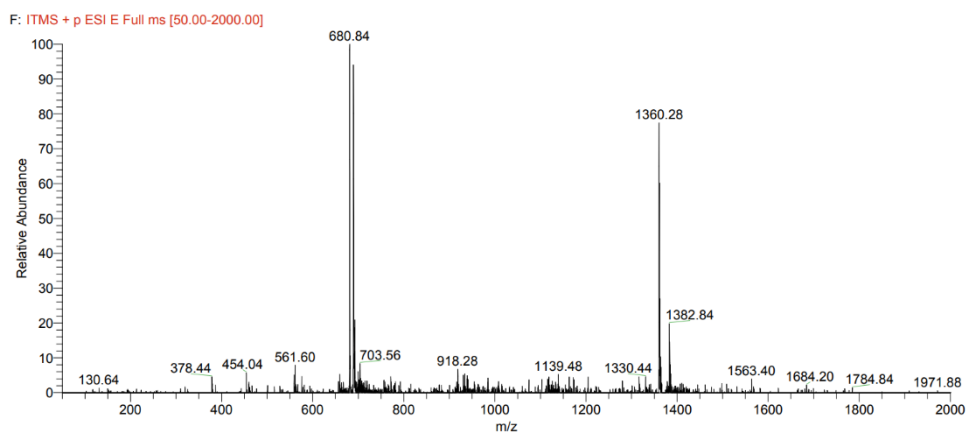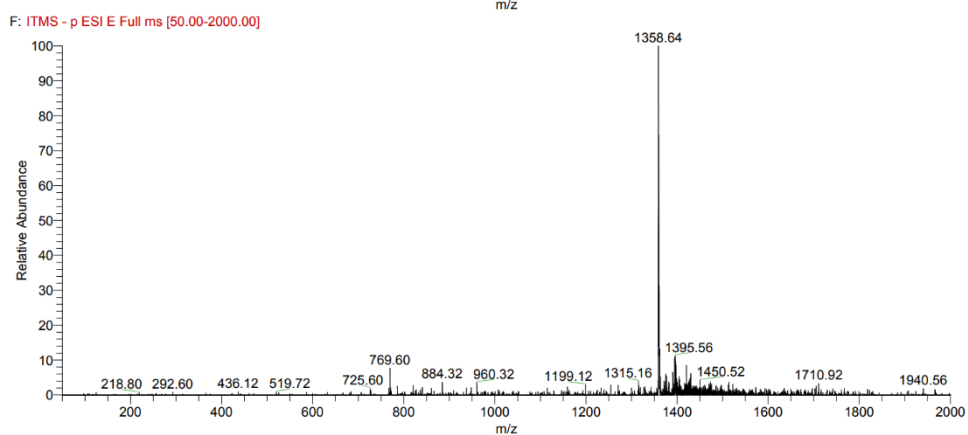

MS analysis of compound **7**. Positive mode: Calcd.  $[M+H]^+$  1360.76,  $[M+2H]^{2+}$  680.88,  $[M+Na]^+$  1382.75,  $[M+2Na]^{2+}$  702.87

Negative mode: Calcd.  $[M-H]^-$  1358.76,  $[M-2H]^{2-}$  678.8

F: ITMS + p ESI E Full ms [50.00-2000.00]

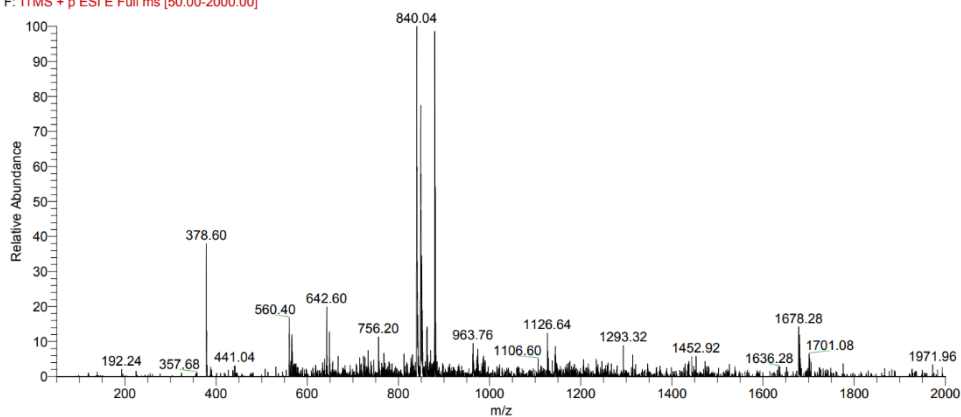

F: ITMS - p ESI E Full ms [50.00-2000.00]

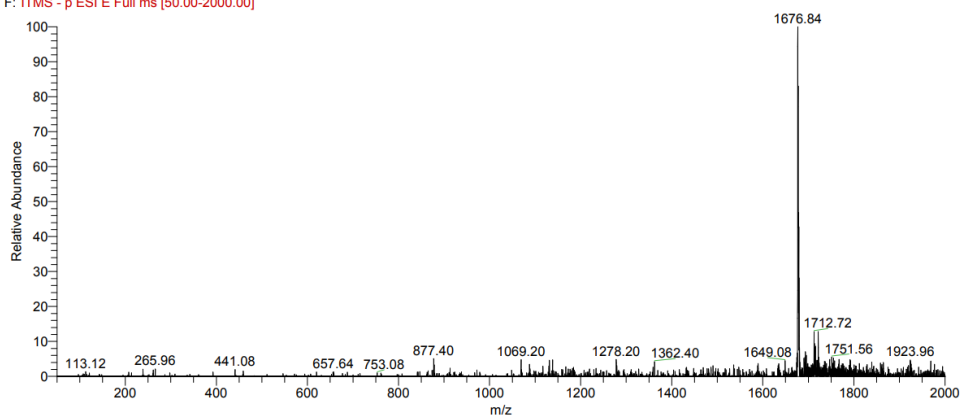

MS analysis of compound **8**. Positive mode: Calcd.  $[M+H]^+$  1678.94,  $[M+2H]^{2+}$  840.97,  $[M+3H]^{3+}$  560.31,  $[M+Na]^+$  1700.93,  $[M+2Na]^{2+}$  861.96,  $[M+H+Na]^{2+}$  850.97

Negative mode: Calcd.  $[M-H]^-$  1676.94

## ***References***

1. Rossin R, Van Duijnhoven SMJ, Ten Hoeve W, et al. Triggered Drug Release from an Antibody-Drug Conjugate Using Fast ‘click-to-Release’ Chemistry in Mice. *Bioconjugate Chemistry*. 2016; 27: 1697–706.
2. Wang Q, Wang Y, Ding J, et al. A bioorthogonal system reveals antitumour immune function of pyroptosis. *Nature*. 2020; 579: 421–6.
